# Supplementary material for: A commercially scalable MOF adsorbent Cu-BTC for helium recovery from natural gas: performance and mechanism studies at room temperature and lower temperatures
Source: Royal Society of Chemistry journal article supplement (doi:10.1039/d5ce00229j), 2025-01-01
Supplement: d5ce00229j8.pdf [file d5ce00229j8.pdf]

## Supplementary Material

### **A commercially scalable MOF adsorbent Cu-BTC for helium recovery from natural gas: Performance and mechanism studies at room temperature and lower temperatures**

**Shoucheng Cui,<sup>a, b, c</sup> Baosheng Chen,<sup>a, b, c</sup> Jiasi Zhao,<sup>a, b, c</sup> Hongbo Xu,<sup>\*a, b</sup> Nan Peng,<sup>a, b</sup> Liqiang Liu,<sup>\*a, b, c</sup>**

<sup>a</sup>Technical Institute of Physics and Chemistry, Chinese Academy of Sciences, Beijing  
100190, China

<sup>b</sup>Key Laboratory of Cryogenic Science and Technology, Beijing 100190, China

<sup>c</sup>University of Chinese Academy of Sciences, Beijing 100049, China

\*To whom correspondence should be addressed. E-mail: hbxu@mail.ipc.ac.cn (H. Xu), lqliu@mail.ipc.ac.cn (L. Liu)

Table S1. Atomic charges and bond length data of adsorbate molecules CO<sub>2</sub>, CH<sub>4</sub>, and N<sub>2</sub>

| Adsorbate       | Parameter           | Value   |
|-----------------|---------------------|---------|
| CO <sub>2</sub> | C atomic charge     | 0.6512  |
|                 | O atomic charge     | -0.3256 |
|                 | C=O bond length (Å) | 1.196   |
| CH <sub>4</sub> | C atomic charge     | -0.24   |
|                 | H atomic charge     | 0.06    |
|                 | C-H bond length (Å) | 1.109   |
| N <sub>2</sub>  | N atomic charge     | 0       |
|                 | N≡N bond length (Å) | 1.12    |

Table S2. Fitting parameters of single-component gas adsorption isotherms of CO<sub>2</sub>, CH<sub>4</sub>, N<sub>2</sub>, and He on Cu-BTC

| Adsorbate       | Temperature (K) | Parameter                                        | Simulation data | Experimental data |
|-----------------|-----------------|--------------------------------------------------|-----------------|-------------------|
| CO <sub>2</sub> | 298             | $n_m$ (mmol·g <sup>-1</sup> )                    | 17.4858         | 13.7039           |
|                 |                 | $b$ (kPa <sup>-1</sup> )                         | 0.0017          | 0.0042            |
|                 |                 | $R^2$ (%)                                        | 99.773          | 99.967            |
| CH <sub>4</sub> | 298             | $n_m$ (mmol·g <sup>-1</sup> )                    | 14.6315         | 15.7576           |
|                 |                 | $b$ (kPa <sup>-1</sup> )                         | 0.0008          | 0.0006            |
|                 |                 | $R^2$ (%)                                        | 99.949          | 99.985            |
|                 | 200             | $n_m$ (mmol·g <sup>-1</sup> )                    | 18.287          | 15.3146           |
|                 |                 | $b$ (kPa <sup>-1</sup> )                         | 0.0102          | 0.0147            |
|                 |                 | $R^2$ (%)                                        | 99.71           | 99.647            |
| N <sub>2</sub>  | 298             | $n_m$ (mmol·g <sup>-1</sup> )                    | 12.4195         | 13.5074           |
|                 |                 | $b$ (kPa <sup>-1</sup> )                         | 0.0004          | 0.0002            |
|                 |                 | $R^2$ (%)                                        | 99.965          | 99.994            |
|                 | 200             | $n_m$ (mmol·g <sup>-1</sup> )                    | 16.3225         | 13.0877           |
|                 |                 | $b$ (kPa <sup>-1</sup> )                         | 0.0025          | 0.0029            |
|                 |                 | $R^2$ (%)                                        | 99.855          | 99.945            |
| He              | 298             | $k_H$ (mmol·g <sup>-1</sup> ·kPa <sup>-1</sup> ) | 0.00027         | 0.00035           |
|                 |                 | $R^2$ (%)                                        | 99.992          | 99.985            |
|                 | 200             | $k_H$ (mmol·g <sup>-1</sup> ·kPa <sup>-1</sup> ) | 0.00045         | 0.00045           |
|                 |                 | $R^2$ (%)                                        | 99.985          | 99.981            |

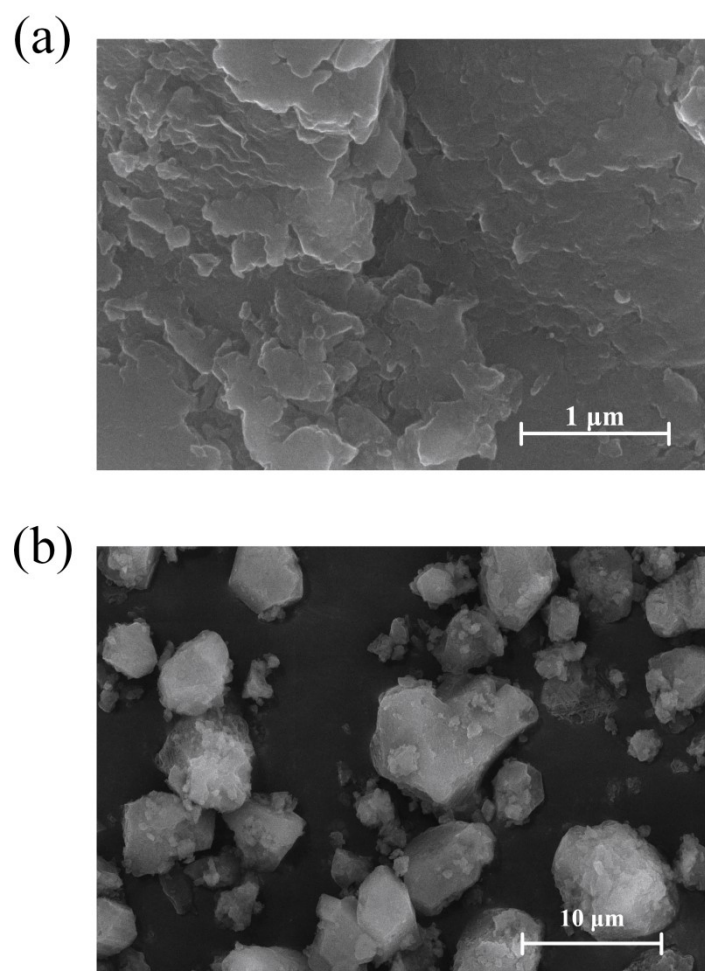

**Fig. S1.** SEM images of Cu-BTC powder

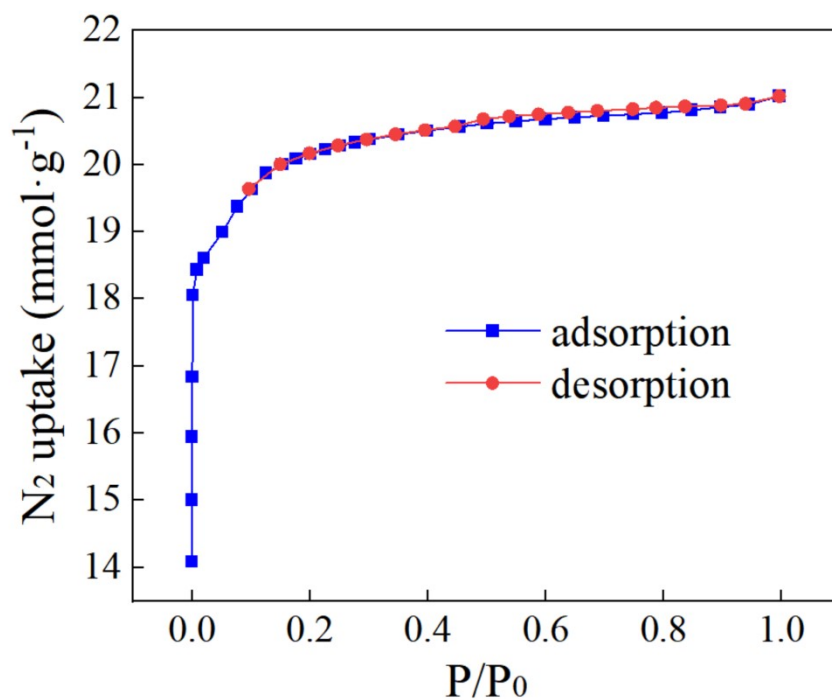

**Fig. S2.** Adsorption-desorption isotherms of N<sub>2</sub> on Cu-BTC sample at 77.3 K, used for calculating the BET specific surface area, where  $P$  is the equilibrium pressure after adsorption and  $P_0$  is the saturation vapor pressure of the adsorbate at the adsorption temperature.

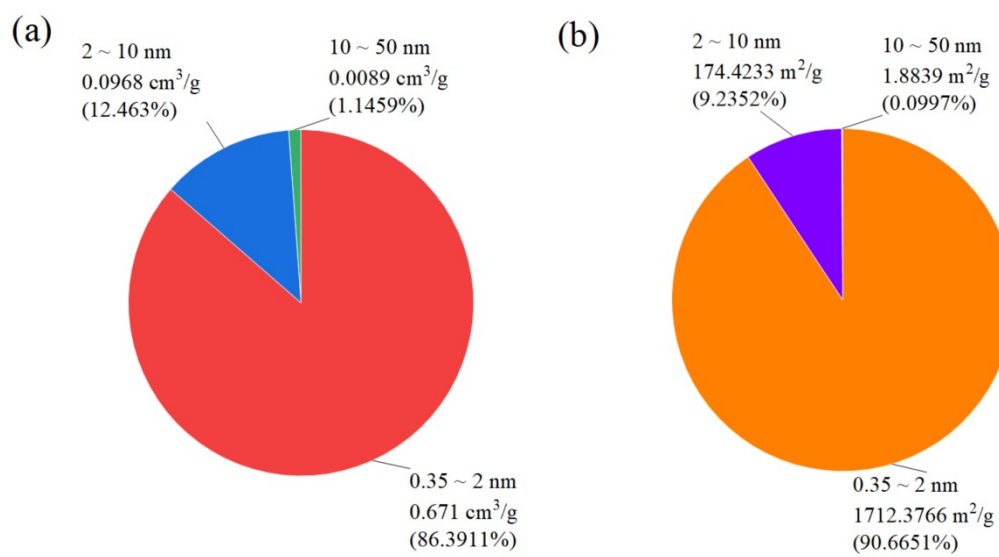

**Fig. S3.** Pore size distribution of Cu-BTC sample based on (a) pore volume and (b) pore area.

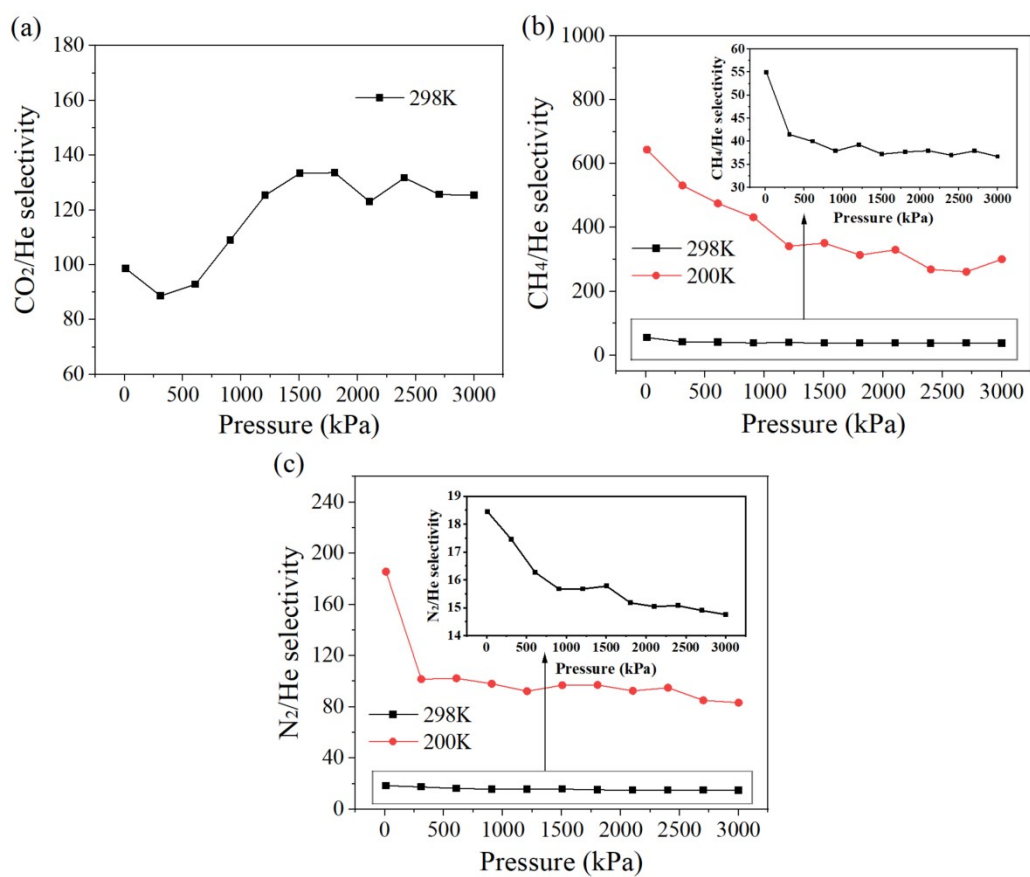

**Fig. S4.** The GCMC simulation-derived selectivity adsorption coefficients of Cu-BTC for  $\text{CO}_2/\text{He}$  (50:50) (a) at 298 K,  $\text{CH}_4/\text{He}$  (50:50) (b) at 298 K and 200 K, and  $\text{N}_2/\text{He}$  (50:50) (c) mixed gases at 298 K.

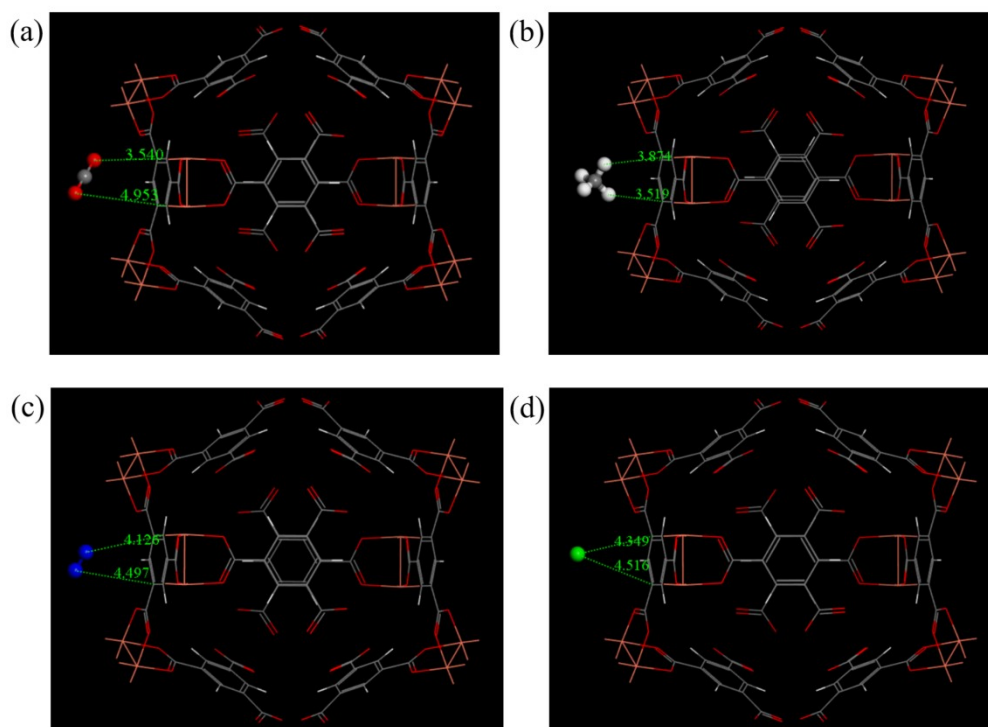

**Fig. S5.** Adsorption configurations of  $\text{CO}_2$  (a),  $\text{CH}_4$  (b),  $\text{N}_2$  (c), and He (d) at the B site in Cu-BTC; atom colors: C (gray), O (red), N (blue), H (white), Cu (orange), He (green).

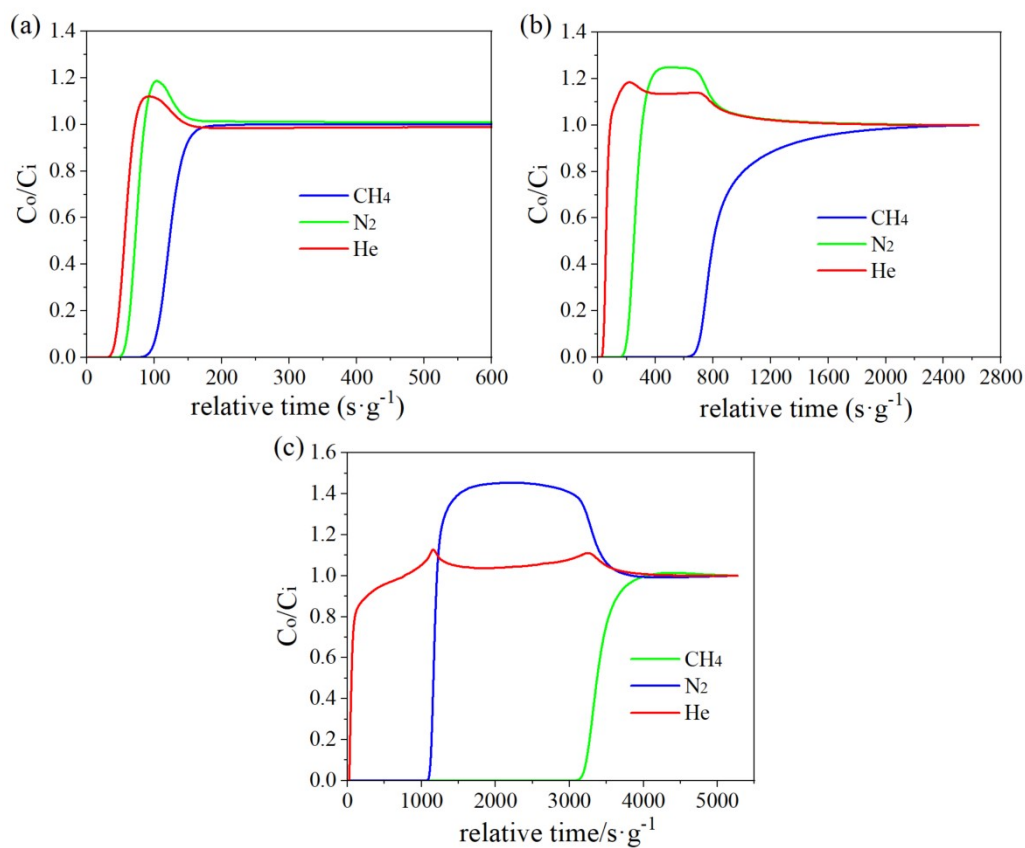

**Fig. S6.** Adsorption breakthrough curves of CH<sub>4</sub>/N<sub>2</sub>/He (33:33:33) ternary mixed gas in Cu-BTC at 298 K (a), 200 K (b), and 150 K (c). The test pressure is 101.324 kPa, with the x-axis representing the ratio of time to sample mass and the y-axis representing the ratio of outlet to inlet concentration for each component.

**BET specific surface area calculation method:**

Based on the adsorption-desorption isotherm data in Fig. S2, select multiple adsorption equilibrium points. Plot a scatter diagram with  $P/P_0$  on the x-axis and  $P/P_0/[V(1-P/P_0)]$  on the y-axis, and perform a linear fit for all data points. Here,  $V$  is the adsorption capacity of the adsorbate on the adsorbent at equilibrium pressure  $P$  ( $\text{cm}^3 \cdot \text{g}^{-1}$ ). According to the BET adsorption model, the equation of the fitted line can be derived as shown in Equation (1):

$$\frac{P/P_0}{V(1-P/P_0)} = \frac{1}{V_m \times C} + \frac{C-1}{V_m \times C} \times \frac{P}{P_0} \quad \backslash * \text{MERGEFORMAT (1)}$$

Where  $V_m$  is the monolayer saturated adsorption capacity of the adsorbent for the adsorbate, and  $C$  is a constant related to the adsorption performance of the adsorbent. The value of  $V_m$  can be determined from the slope  $a$  and intercept  $b$  of the fitted line. The calculation formula is given by Equation (2):

$$V_m = \frac{1}{a+b} \quad \backslash * \text{MERGEFORMAT (2)}$$

The calculation formula for the BET specific surface area  $S$  is shown in Equation (3):

$$S = N_A \times a_m / 22414 \times V_m \quad \backslash * \text{MERGEFORMAT (3)}$$

Where  $N_A$  is Avogadro's constant,  $6.02 \times 10^{23} \text{ mol}^{-1}$ ;  $a_m$  is the cross-sectional area of the adsorbate molecule.

### Calculation method for the IAST selectivity adsorption coefficient:

IAST draws on Raoult's law and introduces surface spreading pressure to study adsorption phase equilibrium. The partial pressure  $P_i$  of gas component  $i$  is:

$$P_i = P_i^0 (\pi_i) x_i \quad \backslash * \text{MERGEFORMAT (4)}$$

Where  $x_i$  and  $\pi_i$  are the mole fraction and surface spreading pressure of component  $i$  in the adsorbed phase, respectively.  $P_i^0$  is the pure gas pressure when it has the same surface spreading pressure as the mixture. At adsorption phase equilibrium, the normalized spreading pressure  $\pi^*$  of all components should be equal:

$$\pi_i^* = \frac{\pi_i A}{RT} = \int_0^{P_i^0} \frac{q_i^0(P)}{P} dP \quad \backslash * \text{MERGEFORMAT (5)}$$

$$\pi_1^* = \pi_2^* = \pi_3^* = \dots = \pi_n^* \quad \backslash * \text{MERGEFORMAT (6)}$$

Where  $q_i^0(P)$  is the equilibrium uptake of the pure gas,  $A$  is the specific surface area of the adsorbent, and the total adsorption amount  $n_t$  is:

$$n_t = 1 / \sum_{i=1}^n \frac{x_i}{q_i^0(P_i^0)} \quad \backslash * \text{MERGEFORMAT (7)}$$

$$\sum_{i=1}^n x_i = 1 \quad \backslash * \text{MERGEFORMAT (8)}$$

For a binary mixture composed of components 1 and 2, applying IAST requires satisfying the following conditions:

$$P y_1 = P_1 x_1 \quad \backslash * \text{MERGEFORMAT (9)}$$

$$P y_2 = P_2 x_2 \quad \backslash * \text{MERGEFORMAT (10)}$$

$$x_1 + y_1 = 1 \quad \backslash * \text{MERGEFORMAT (11)}$$

$$x_2 + y_2 = 1 \quad \backslash * \text{MERGEFORMAT (12)}$$

Where  $P$  is the total pressure,  $P_i$  ( $i=1, 2$ ) is the pressure of components 1 and 2 when they have the same surface spreading pressure as the mixture, and  $x_i$  and  $y_i$  ( $i=1, 2$ ) represent the mole fractions in the adsorbed phase and gas phase, respectively. According to Equation (13), the selectivity adsorption coefficient  $S_{1/2}$  can be calculated:

$$S_{1/2} = \frac{x_1/y_1}{x_2/y_2} \quad \backslash * \text{MERGEFORMAT (13)}$$
