# Supplementary figures and images for: A commercially scalable MOF adsorbent Cu-BTC for helium recovery from natural gas: performance and mechanism studies at room temperature and lower temperatures
Source: Royal Society of Chemistry journal article supplement (doi:10.1039/d5ce00229j), 2025-01-01

(a)

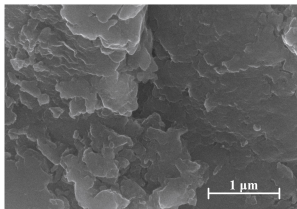

(b)

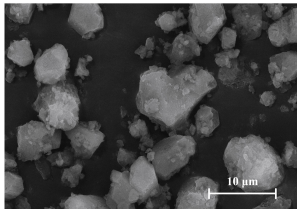

Supplement: d5ce00229j2.pdf [file d5ce00229j2.pdf]

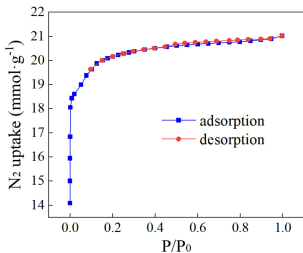

Supplement: d5ce00229j3.pdf [file d5ce00229j3.pdf]
